# Supplementary material
Source: publisher figshare collection journal article supplement (https://gsajournals.figshare.com/ndownloader/files/25833998)
Supplement: Supplementary file 1 [file 25833998]

| **Table S2. Inversion break points between the v. 4 reference assembly and the Paxton Lake de novo assembly** |
| --- |

| v. 4 Chr. | v. 4 Inversion Start | v. 4 Inversion End | Paxton Lake inversion start | Paxton Lake inversion end |
| --- | --- | --- | --- | --- |
| chrVIII | 1 | 1140820 | 1218534 | 31276 |
| chrVIII | 20089363 | 20606474 | 22708465 | 22286410 |
| chrXIII | 20090108 | 20238567 | 21716704 | 21502474 |
| chrXVII | 11796258 | 11937045 | 8470266 | 8610694 |
| chrV | 23410 | 1204467 | 1351509 | 31788 |
| chrV | 15294850 | 15552731 | 16459132 | 16040422 |
| chrXIV | 15162669 | 15969813 | 57700 | 1016924 |
| chrXIV | 5769 | 142540 | 15747639 | 15883585 |
| chrXIV | 143541 | 398658 | 15167183 | 15503632 |
| chrIII | 14119334 | 14486102 | 15037037 | 14634125 |
| chrX | 1 | 1407544 | 1672681 | 1 |
| chrX | 17378164 | 17731137 | 17008479 | 16615500 |
| chrIV | 33774690 | 34231980 | 5715 | 467917 |
| chrIV | 369255 | 444319 | 34688853 | 34831724 |
| chrVII | 11422452 | 13062224 | 19330687 | 21136880 |
| chrXVII | 626048 1163989 | 1163989 | 20796025 | 21714787 |
